# Supplementary material
Source: PubMed Central journal article supplement (PMC5885246)
Supplement: jamaoncol-4-661-s002.pdf [file jamaoncol-4-661-s002.pdf]

## Supplementary Online Content

Yoon SM, Ryoo B-Y, Lee SJ, et al. Efficacy and safety of transarterial chemoembolization plus external beam radiotherapy vs sorafenib in hepatocellular carcinoma with macroscopic vascular invasion: a randomized trial. *JAMA Oncol*. Published online March 15, 2018. doi:10.1001/jamaoncol.2017.5847

**eTable 1.** Baseline Characteristics of the Patients

**eTable 2.** Characteristics of Patients at Baseline vs Treatment Crossover on Disease Progression in 24 Weeks

**eTable 3.** Radiologic Response Evaluation Between the Primary and Secondary Radiologic Reviews in 24 Weeks

**eTable 4.** Details of Discordance Between Primary and Secondary Central Radiologic Reviews

**eTable 5.** Changes in Alpha-Fetoprotein (AFP) at Weeks 12 and 24 by Treatment Groups

**eTable 6.** Treatment-Emergent Adverse Events in the Safety Population

**eTable 7.** Adverse Event Categories in the Safety Population

**eTable 8.** Exposure to Sorafenib, Transarterial Chemoembolization, and Radiation in 24 Weeks

**eFigure 1.** Estimated Progression-Free Survival Rate in 24 Weeks by Secondary Central Radiologic Reviews

**eFigure 2.** Changes in Alpha-Fetoprotein (AFP) Levels in 24 Weeks by Treatment Groups

**eFigure 3.** Estimated Progression-Free Survival During Follow-up

**eFigure 4.** A Representative Case of a 52-Year-Old Man With Hepatocellular Carcinoma (HCC) With Portal Vein Tumor Thrombus (PVTT) Who Was Assigned to the Combined Transarterial Chemoembolization (TACE) Plus Radiotherapy (RT) Group

This supplementary material has been provided by the authors to give readers additional information about their work.

**eTable 1. Baseline Characteristics of the Patients**

| Characteristics                        | Sorafenib<br>(n = 45) | TACE+RT<br>(n = 45)  | P-value |
|----------------------------------------|-----------------------|----------------------|---------|
| Age, years, median (range)             | 55 (33 – 82)          | 55 (42 – 77)         | 0.15    |
| Sex, no. (%)                           |                       |                      | 0.76    |
| Male                                   | 39 (86.7%)            | 38 (84.4%)           |         |
| Female                                 | 6 (13.3%)             | 7 (15.6%)            |         |
| Child-Pugh class A, no. (%)            | 45 (100%)             | 45 (100%)            | >0.99   |
| Albumin, g/dL, median (IQR)            | 3.5 (3.3 – 3.8)       | 3.5 (3.3 – 3.9)      | 0.49    |
| Total bilirubin, mg/dL, median (IQR)   | 0.7 (0.6 – 1.0)       | 0.7 (0.6 – 1.0)      | 0.64    |
| ECOG performance status, no. (%)       |                       |                      | 0.53    |
| 0                                      | 22 (48.9%)            | 19 (42.2%)           |         |
| 1                                      | 23 (51.1%)            | 26 (57.8%)           |         |
| Cause of disease, no. (%)              |                       |                      | 0.39    |
| Hepatitis B virus infection            | 40 (88.9%)            | 36 (80.0%)           |         |
| Hepatitis C virus infection            | 0                     | 1 (2.2%)             |         |
| Others                                 | 5 (11.1%)             | 8 (17.8%)            |         |
| Tumor size, maximum, cm, median (IQR)  | 9.6 (7.0 - 11.8)      | 9.8 (8.0 – 12.8)     | 0.89    |
| Tumor number, no. (%)                  |                       |                      | 0.07    |
| Single                                 | 13 (28.9%)            | 6 (13.3%)            |         |
| Multiple                               | 32 (71.1%)            | 39 (86.7%)           |         |
| Tumor extent, no. (%)                  |                       |                      | 0.21    |
| Unilobar involvement                   | 27 (60.0%)            | 21 (46.7%)           |         |
| Bilobar involvement                    | 18 (40.0%)            | 24 (53.3%)           |         |
| Level of vascular invasion, no. (%)    |                       |                      | 0.95    |
| Unilateral PV                          | 27 (60.0%)            | 26 (57.8%)           |         |
| Bilateral or main PV                   | 16 (35.6%)            | 17 (37.8%)           |         |
| Unilateral PV+HV/IVC                   | 1 (2.2%)              | 1 (2.2%)             |         |
| Bilateral PV+HV/IVC                    | 1 (2.2%)              | 1 (2.2%)             |         |
| Bile duct invasion, no. (%)            |                       |                      | 0.04    |
| No                                     | 45 (100.0%)           | 41 (91.1%)           |         |
| Yes                                    | 0                     | 4 (8.9%)             |         |
| Alpha-fetoprotein, ng/mL, median (IQR) | 667 (36 – 51,138)     | 1496 (78 – 37,736)   | 0.86    |
| PIVKA-II, mAU/mL, median (IQR)         | 2,426 (111 – 13,775)  | 2,266 (150 – 16,339) | 0.98    |

ECOG, Eastern Cooperative Oncology Group; HV, hepatic vein; IQR, inter-quartile range; IVC, inferior vena cava; PIVKA-II, protein induced by vitamin K absence or antagonist; PV, portal vein; RT, external beam radiation therapy; TACE, transarterial chemoembolization.

**eTable 2. Characteristics of Patients at Baseline vs Treatment Crossover on Disease Progression in 24 Weeks**

| Characteristics                                          | Sorafenib            |                          |                  | TACE+RT             |                         |                  |
|----------------------------------------------------------|----------------------|--------------------------|------------------|---------------------|-------------------------|------------------|
|                                                          | Baseline<br>(n = 34) | At crossover<br>(n = 34) | P-value (paired) | Baseline<br>(n = 9) | At crossover<br>(n = 9) | P-value (paired) |
| Failure patterns at the time of treatment cross-over     |                      |                          |                  |                     |                         |                  |
| Intrahepatic progression                                 |                      | 24 (70.6%)               |                  |                     | 3 (33.3%)               |                  |
| Extrahepatic metastasis                                  |                      | 0                        |                  |                     | 1 (11.1%)               |                  |
| Both (intrahepatic + extrahepatic)                       |                      | 10 (29.4%)               |                  |                     | 5 (55.6%)               |                  |
| Characteristics                                          |                      |                          |                  |                     |                         |                  |
| Child-Pugh class A, no. (%)                              | 34 (100%)            | 24 (70.6%)               | 0.01             | 9 (100%)            | 7 (77.8%)               | 0.47             |
| Albumin, g/dL, median (IQR)                              | 3.6 (3.3 – 3.8)      | 3.3 (2.9 – 3.7)          | 0.04             | 3.5 (3.3 – 3.7)     | 3.0 (2.8 – 3.2)         | 0.01             |
| Total bilirubin, mg/dL, median (IQR)                     | 0.8 (0.5 – 1.0)      | 0.8 (0.5 – 1.2)          | 0.08             | 0.8 (0.6 – 1.0)     | 0.9 (0.8 – 1.5)         | 0.11             |
| ECOG performance status, no. (%)                         |                      |                          | 0.05             |                     |                         | >0.99            |
| 0                                                        | 17 (50%)             | 25 (73.5%)               |                  | 3 (33.3%)           | 2 (22.2%)               |                  |
| 1                                                        | 17 (50%)             | 9 (26.4%)                |                  | 6 (66.7%)           | 7 (77.8%)               |                  |
| Alpha-fetoprotein, log <sub>10</sub> ng/mL, median (IQR) | 2.61 (1.56 – 4.06)   | 2.79 (1.68 – 4.63)       | 0.44             | 1.88 (1.15 – 4.39)  | 2.15 (1.05 – 4.55)      | 0.86             |

IQR, inter-quartile range; ECOG, Eastern Cooperative Oncology Group; TACE, transarterial chemoembolization; RT, external beam radiation therapy.

**eTable 3. Radiologic Response Evaluation Between the Primary and Secondary Radiologic Reviews in 24 Weeks**

| Within 24 weeks |                | Secondary central review |                |                | Total |
|-----------------|----------------|--------------------------|----------------|----------------|-------|
|                 |                | Non-PD                   | PD             | Not Evaluable* |       |
| Primary review  | Non-PD         | 24                       | 4 <sup>†</sup> | NA             | 28    |
|                 | PD             | 0                        | 55             | NA             | 55    |
|                 | Not Evaluable* | NA                       | NA             | 7              | 7     |
| Total           |                | 24                       | 59             | 7              | 90    |

The discordance rate between primary and central radiologic reviews among evaluable patients was 4.8% (4/83), which was not statistically significant ( $P=0.13$  by McNemar test).

PD, progressive disease.

\*Not evaluable, due to death without radiologic disease progression or early study termination by withdrawal or adverse event.

<sup>†</sup>The detailed reasons of discordance were summarized in Supplementary Table 4.

**eTable 4. Details of Discordance Between Primary and Secondary Central Radiologic Reviews**

| Case No. | Treatment group | Weeks after randomization | Primary review | Secondary central review | Reasons of discordance                                                   |
|----------|-----------------|---------------------------|----------------|--------------------------|--------------------------------------------------------------------------|
| 31       | TACE+RT         | 24                        | Stable disease | Progressive disease      | A new small lesion in contralateral liver lobe was counted as PD         |
| 40       | TACE+RT         | 24                        | Stable disease | Progressive disease      | Multiple new small lesions in contralateral liver lobe was counted as PD |
| 80       | TACE+RT         | 24                        | Stable disease | Progressive disease      | A new small lesion in contralateral liver lobe was counted as PD         |
| 88       | TACE+RT         | 24                        | Stable disease | Progressive disease      | Multiple new small lesions in contralateral liver lobe was counted as PD |

**eTable 5. Changes in Alpha-Fetoprotein (AFP) at Weeks 12 and 24 by Treatment Groups**

|                              | Sorafenib          |                      |                      |                  |                              | TACE+RT            |                      |                      |                  |                              |
|------------------------------|--------------------|----------------------|----------------------|------------------|------------------------------|--------------------|----------------------|----------------------|------------------|------------------------------|
|                              | Baseline<br>(n=45) | At week 12<br>(n=39) | At week 24<br>(n=31) | <i>P</i> -value* | <i>P</i> -value <sup>†</sup> | Baseline<br>(n=45) | At week 12<br>(n=45) | At week 24<br>(n=38) | <i>P</i> -value* | <i>P</i> -value <sup>†</sup> |
| AFP, ng/mL                   | 667 (36-51,138)    | 646 (48-33,815)      | 153 (45-1,840)       | 0.21             | 0.40                         | 1,496 (78-37,736)  | 163 (14-2,398)       | 85 (8-590)           | 0.54             | 0.049                        |
| AFP, log <sub>10</sub> ng/mL | 2.82 (1.55-4.68)   | 2.81 (1.68-4.53)     | 2.18 (1.65-3.27)     | 0.19             | 0.68                         | 3.18 (1.89-4.58)   | 2.21 (1.14-3.38)     | 1.92 (0.91-2.77)     | <0.001           | <0.001                       |

Expressed as median (IQR).

\*Between baseline and week 12

<sup>†</sup>Between baseline and week 24

**eTable 6. Treatment-Emergent Adverse Events in the Safety Population**

| Adverse event category*              | Sorafenib (n = 44) | TACE+RT (n = 45) | P Value |
|--------------------------------------|--------------------|------------------|---------|
| Patient number                       | 44†                | 45               |         |
| Any adverse events                   | 41 (93.2%)         | 41 (91.1%)       | >0.99   |
| Adverse events ≥ Grade 3             | 12 (27.3%)         | 7 (15.6%)        | 0.18    |
| Serious adverse events               | 5‡ (11.4%)         | 5§ (11.1%)       | 0.97    |
| Discontinuation due to adverse event | 1                  | 0                | 0.49    |
| Dose reduction due to adverse event  | 6¶                 | 0                | 0.01    |

\*Patients are counted once for each category.

†By modified intention-to-treat analysis excepting a patient who withdrew consent before the treatment in the sorafenib group.

‡Skin rash, abdominal pain, abdominal distension, liver abscess, and hepatic encephalopathy.

§Cisplatin anaphylactoid reaction, grade 4 liver enzyme elevation, hyperbilirubinemia, and two bilomas.

|| Severe mucositis.

¶hand-foot syndrome, hypertension, and abdominal pain.

**eTable 7. Adverse Event Categories in the Safety Population**

|                    | Sorafenib group (n = 44)* |           |          |         | TACE+RT group (n = 45) |            |           |          |
|--------------------|---------------------------|-----------|----------|---------|------------------------|------------|-----------|----------|
| NCI-CTCAE Grade    | Grade 1                   | Grade 2   | Grade 3  | Grade 4 | Grade 1                | Grade 2    | Grade 3   | Grade 4  |
| Anorexia           | 4 (9.1%)                  | 3 (6.8%)  | 1 (2.3%) | 0       | 18 (40.0%)             | 4 (8.9%)   | 0         | 0        |
| Fatigue            | 5 (11.4%)                 | 0         | 0        | 0       | 6 (13.3%)              | 3 (6.7%)   | 0         | 0        |
| Fever              | 0                         | 0         | 0        | 0       | 13 (28.9%)             | 3 (6.7%)   | 0         | 0        |
| Nausea             | 12 (27.3)                 | 2 (4.5%)  | 0        | 0       | 29 (64.4%)             | 3 (6.7%)   | 0         | 0        |
| Diarrhea           | 12 (27.3%)                | 4 (9.1%)  | 2 (4.5%) | 0       | 2 (4.4%)               | 1 (2.2%)   | 1 (2.2%)  | 0        |
| Abdominal pain     | 9 (20.5%)                 | 4 (9.1%)  | 1 (2.3%) | 0       | 22 (48.9%)             | 13 (28.9%) | 1 (2.2%)  | 0        |
| Constipation       | 0                         | 0         | 0        | 0       | 1 (2.2%)               | 0          | 0         | 0        |
| Hand-foot syndrome | 14 (31.8%)                | 9 (20.5%) | 2 (4.5%) | 0       | 0                      | 0          | 0         | 0        |
| Skin rash          | 4 (9.1%)                  | 4 (9.1%)  | 0        | 0       | 0                      | 0          | 0         | 0        |
| Hypertension       | 3 (6.8%)                  | 7 (15.9%) | 4 (9.1%) | 0       | 0                      | 0          | 0         | 0        |
| Mucositis          | 2 (4.5%)                  | 2 (4.5%)  | 1 (2.3%) | 0       | 0                      | 0          | 0         | 0        |
| Hoarseness         | 4 (9.1%)                  | 2 (4.5%)  | 0        | 0       | 0                      | 0          | 0         | 0        |
| AST/ALT increase   | 0                         | 0         | 3 (6.8%) | 0       | 0                      | 0          | 5 (11.1%) | 1 (2.2%) |
| Bilirubin increase | 0                         | 1 (2.3%)  | 0        | 0       | 0                      | 0          | 1 (2.2%)  | 0        |
| Non-classic RILD   | 0                         | 0         | 0        | 0       | 12 (26.7%)             | 0          | 0         | 0        |

\*By modified intention-to-treat analysis excepting a patient who withdrew consent before the treatment in the sorafenib group.

ALT, alanine transaminase; AST, aspartate transaminase; NCI-CTCAE, National Cancer Institute Common Terminology Criteria for Adverse Events version 4.03; RILD, radiation-induced liver disease; RT, radiotherapy; TACE, transarterial chemoembolization.

**eTable 8. Exposure to Sorafenib, Transarterial Chemoembolization, and Radiation in 24 Weeks**

| <b>Characteristics</b>                                    | <b>Sorafenib<br/>(n = 44)</b> |
|-----------------------------------------------------------|-------------------------------|
| Duration of treatment (weeks)                             |                               |
| Mean (SD)                                                 | 10.7 (7.1)                    |
| Median (IQR)                                              | 6.6 (5.8 – 16.6)              |
| Actual daily dose* (mg/day)                               |                               |
| Mean (SD)                                                 | 739 (110)                     |
| Median (IQR)                                              | 800 (730 – 800)               |
| Percent of planned dose (%)                               |                               |
| Mean (SD)                                                 | 92.4 (13.8)                   |
| Median (IQR)                                              | 100 (91.2 – 100)              |
| Dose modifications                                        | 14 (31.8%)                    |
| Dose interruption                                         | 12 (27.3%)                    |
| Dose reduction                                            | 6 (13.6%)                     |
| <b>Characteristics</b>                                    | <b>TACE+RT<br/>(n = 45)</b>   |
| Number of TACE procedures                                 |                               |
| 1                                                         | 2 (4.4%)                      |
| 2                                                         | 2 (4.4%)                      |
| 3                                                         | 12 (26.7%)                    |
| 4                                                         | 29 (64.5%)                    |
| Mean (SD)                                                 | 3.5 (0.9)                     |
| Median (IQR)                                              | 4 (3 – 4)                     |
| Interval between 1 <sup>st</sup> TACE and RT start (days) |                               |
| Mean (SD)                                                 | 15.6 (2.9)                    |
| Median (IQR)                                              | 15 (13 – 19)                  |
| Radiation dose                                            |                               |
| 20 Gy <sup>†</sup>                                        | 1 (2.2%)                      |
| 30 Gy                                                     | 9 (20.0%)                     |
| 35 Gy                                                     | 12 (26.7%)                    |
| 40 Gy                                                     | 7 (15.5%)                     |
| 45 Gy                                                     | 16 (35.6%)                    |
| Mean (SD)                                                 | 38 Gy (6.4)                   |
| Median (IQR)                                              | 40 Gy (35 – 45)               |
| Fraction size                                             |                               |
| 2.5 Gy                                                    | 30 (66.7%)                    |
| 3.0 Gy                                                    | 15 (33.3%)                    |

SD, standard deviation; IQR, inter-quartile range; TACE, transarterial chemoembolization; RT, external beam radiation therapy.

\*Assessed by returned pill counts and patient survey

<sup>†</sup>Planned radiation dose was not delivered, because of the deteriorated patient's performance status.



**eFigure 1. Estimated Progression-Free Survival Rate in 24 Weeks by Secondary Central Radiologic Reviews**

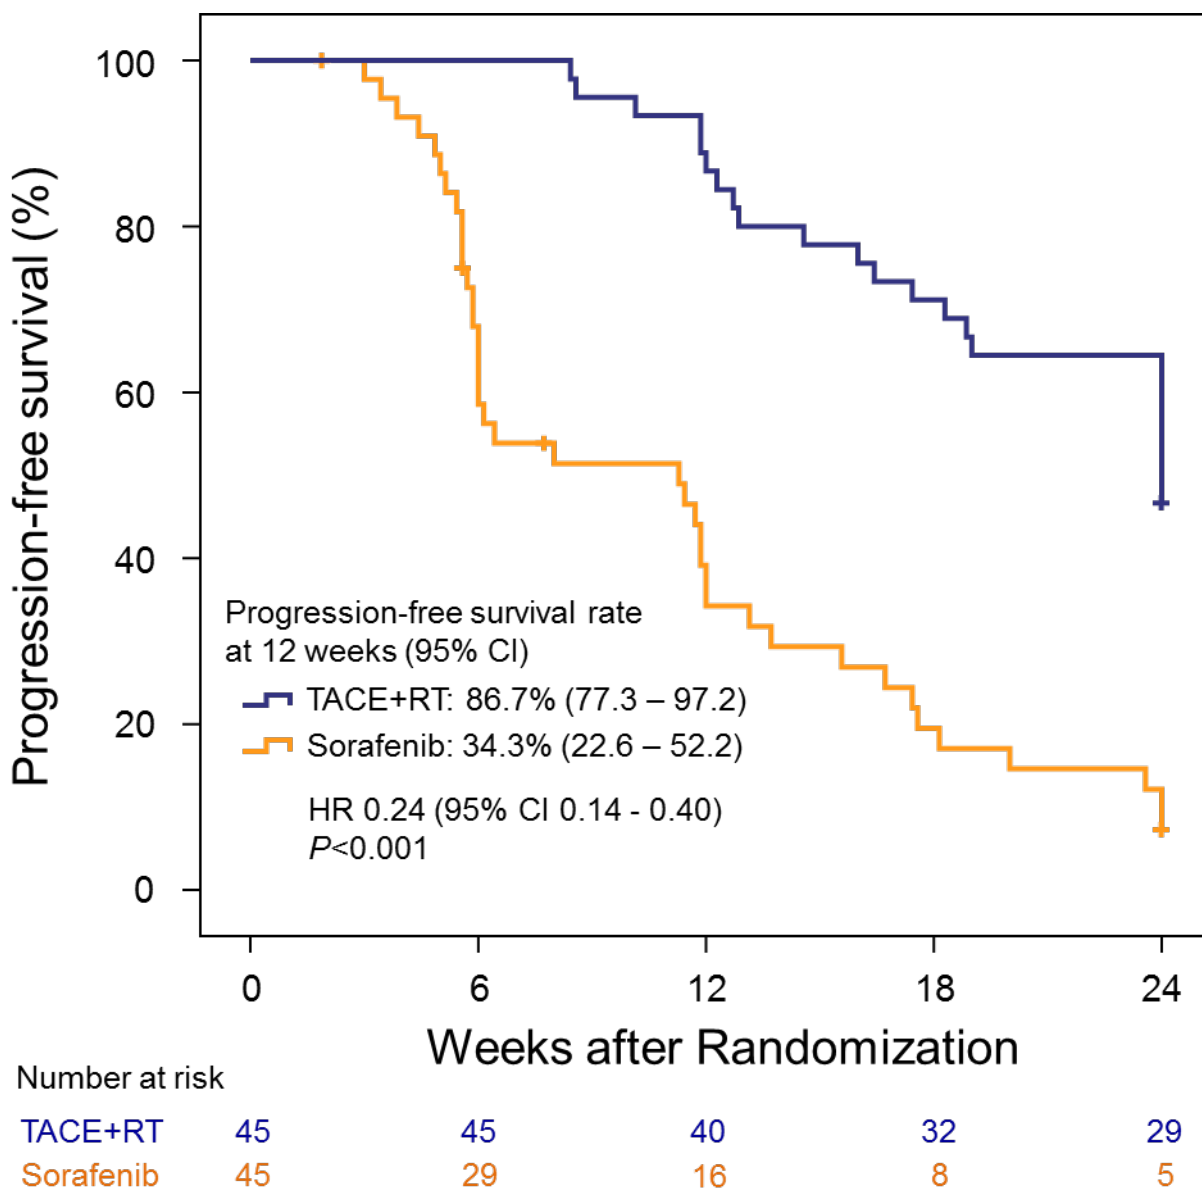

**eFigure 2. Changes in Alpha-Fetoprotein (AFP) Levels in 24 Weeks by Treatment Groups**

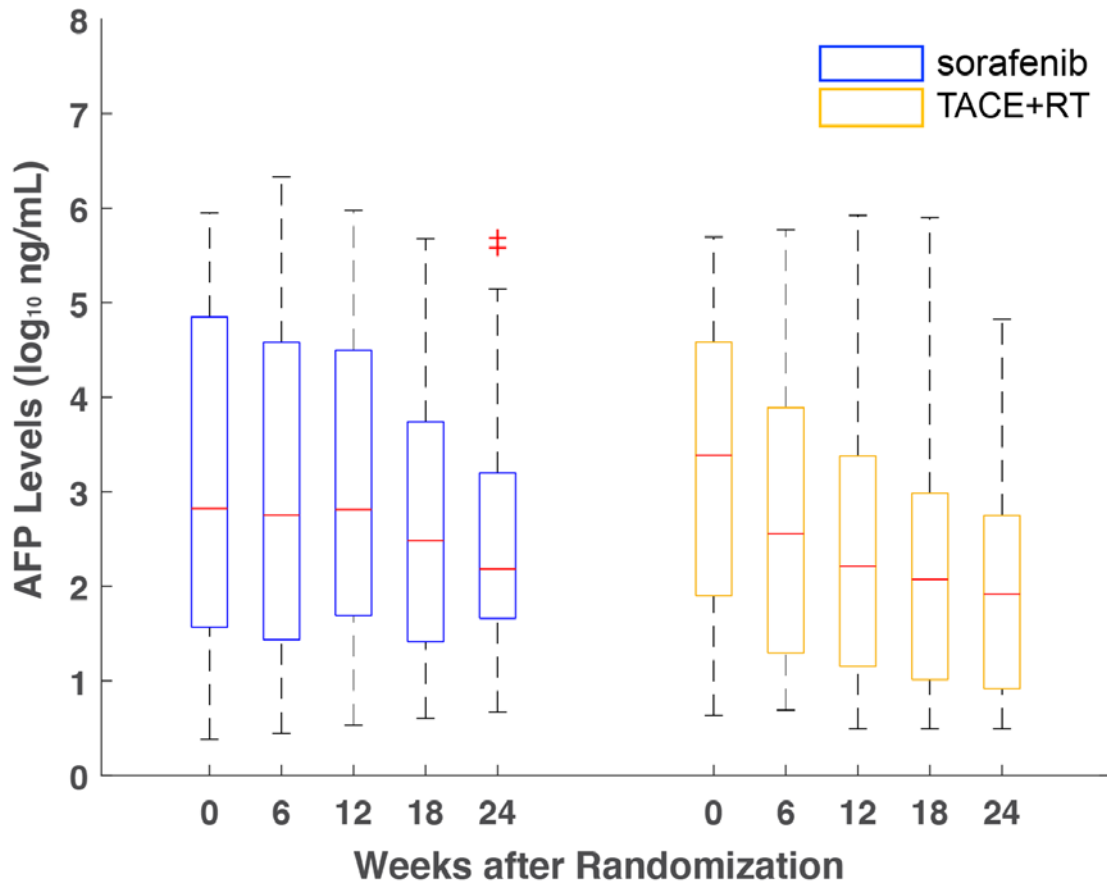

**eFigure 3. Estimated Progression-Free Survival During Follow-up**  
**A. Patients with HCC and unilateral portal vein invasion**

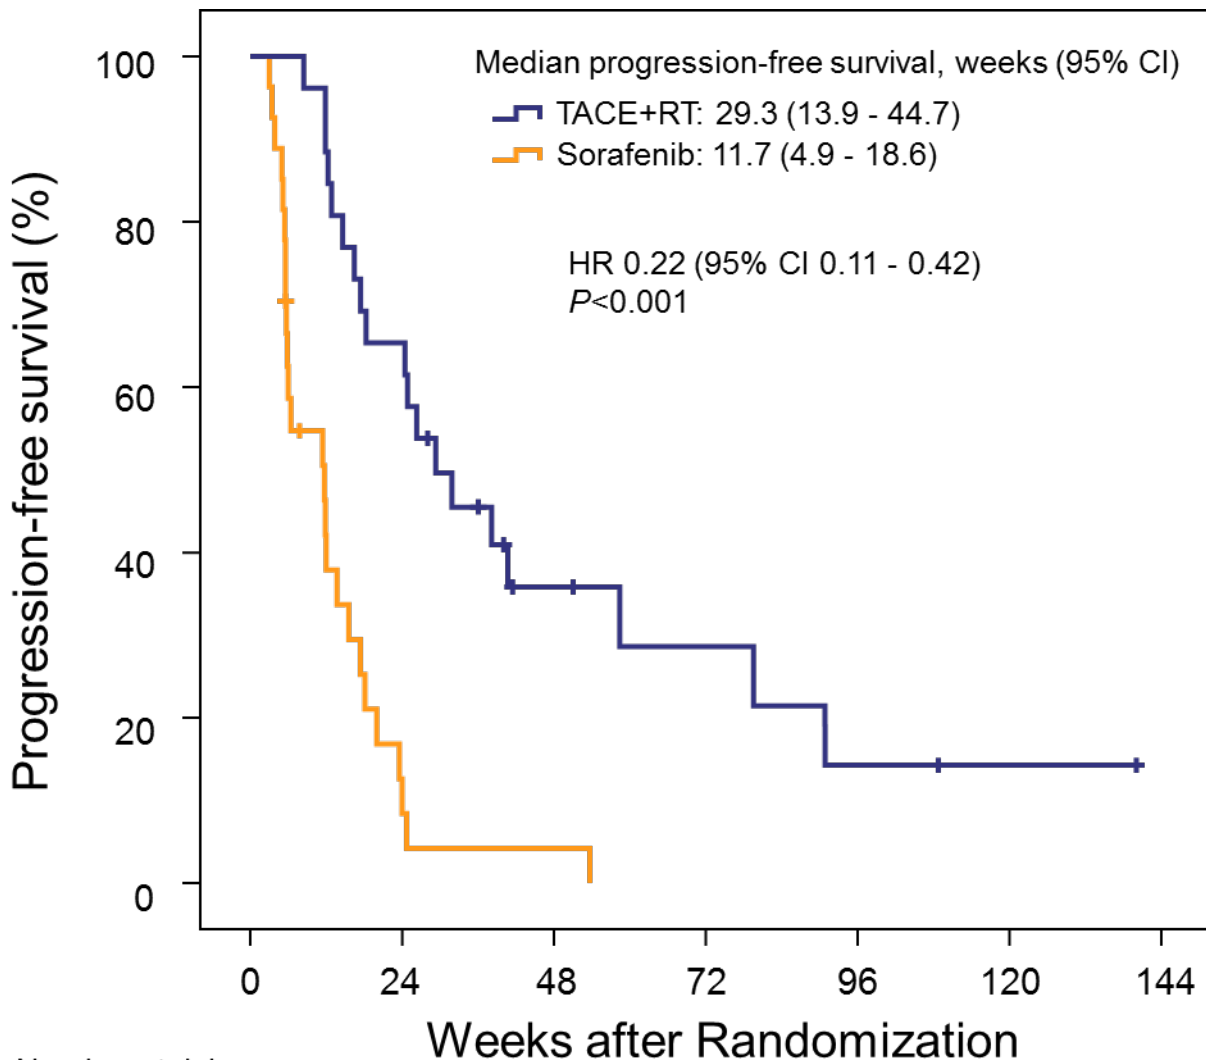

Number at risk

|           |    |    |   |   |   |   |
|-----------|----|----|---|---|---|---|
| TACE+RT   | 26 | 17 | 6 | 4 | 2 | 1 |
| Sorafenib | 27 | 3  | 1 | 0 | 0 | 0 |

**B. Patients with HCC and multiple vascular invasion**

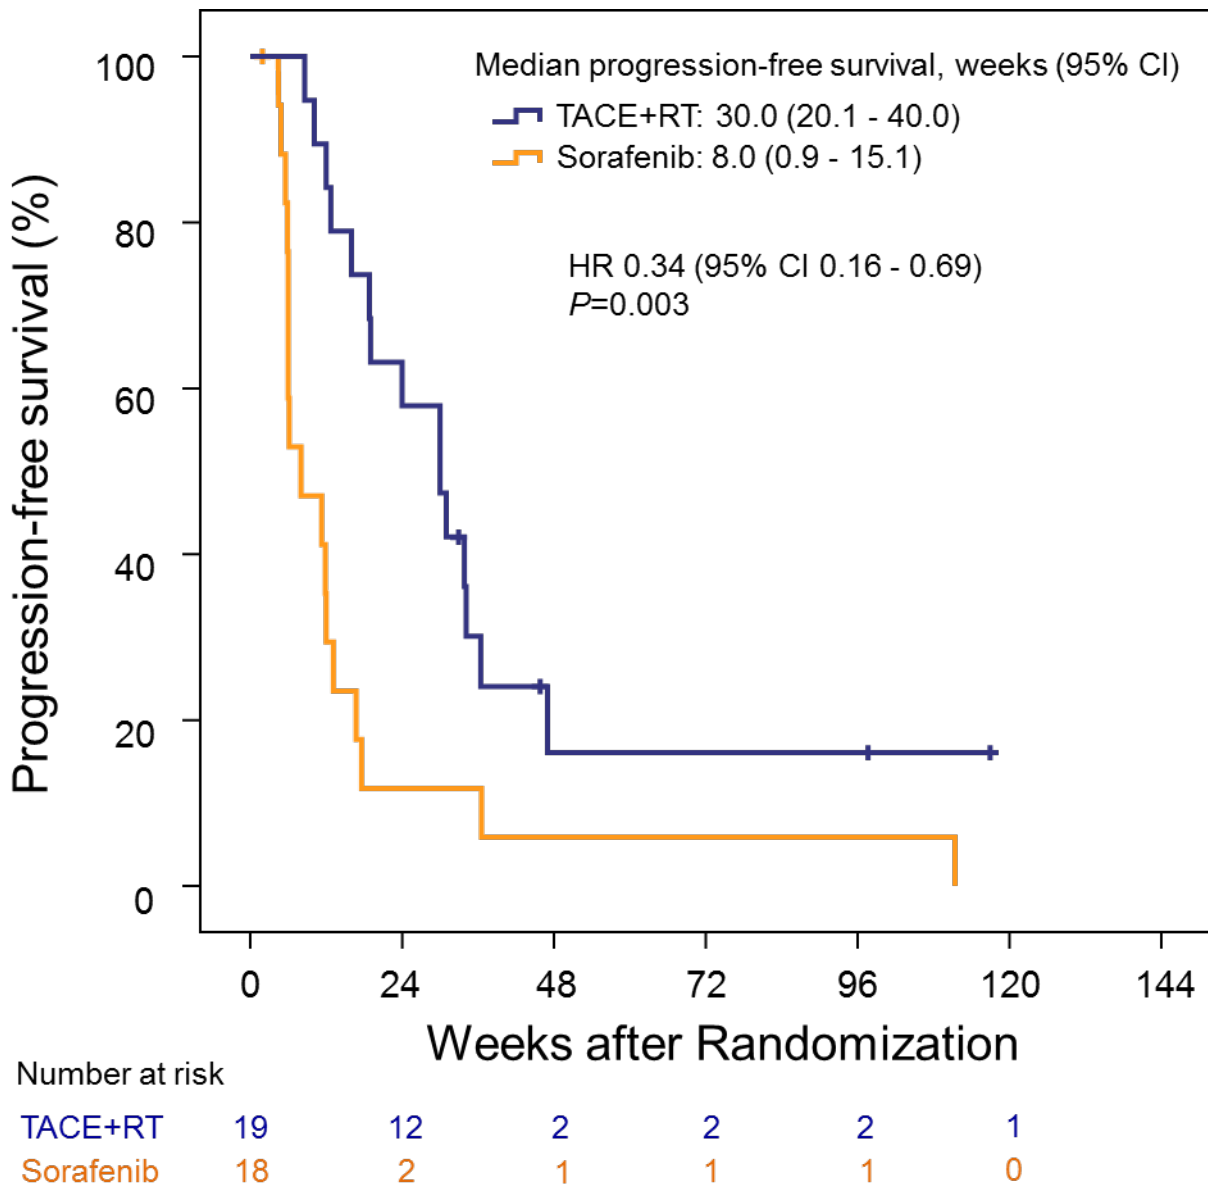

**eFigure 4. A Representative Case of a 52-Year-Old Man With Hepatocellular Carcinoma (HCC) With Portal Vein Tumor Thrombus (PVTT) Who Was Assigned to the Combined Transarterial Chemoembolization (TACE) Plus Radiotherapy (RT) Group**

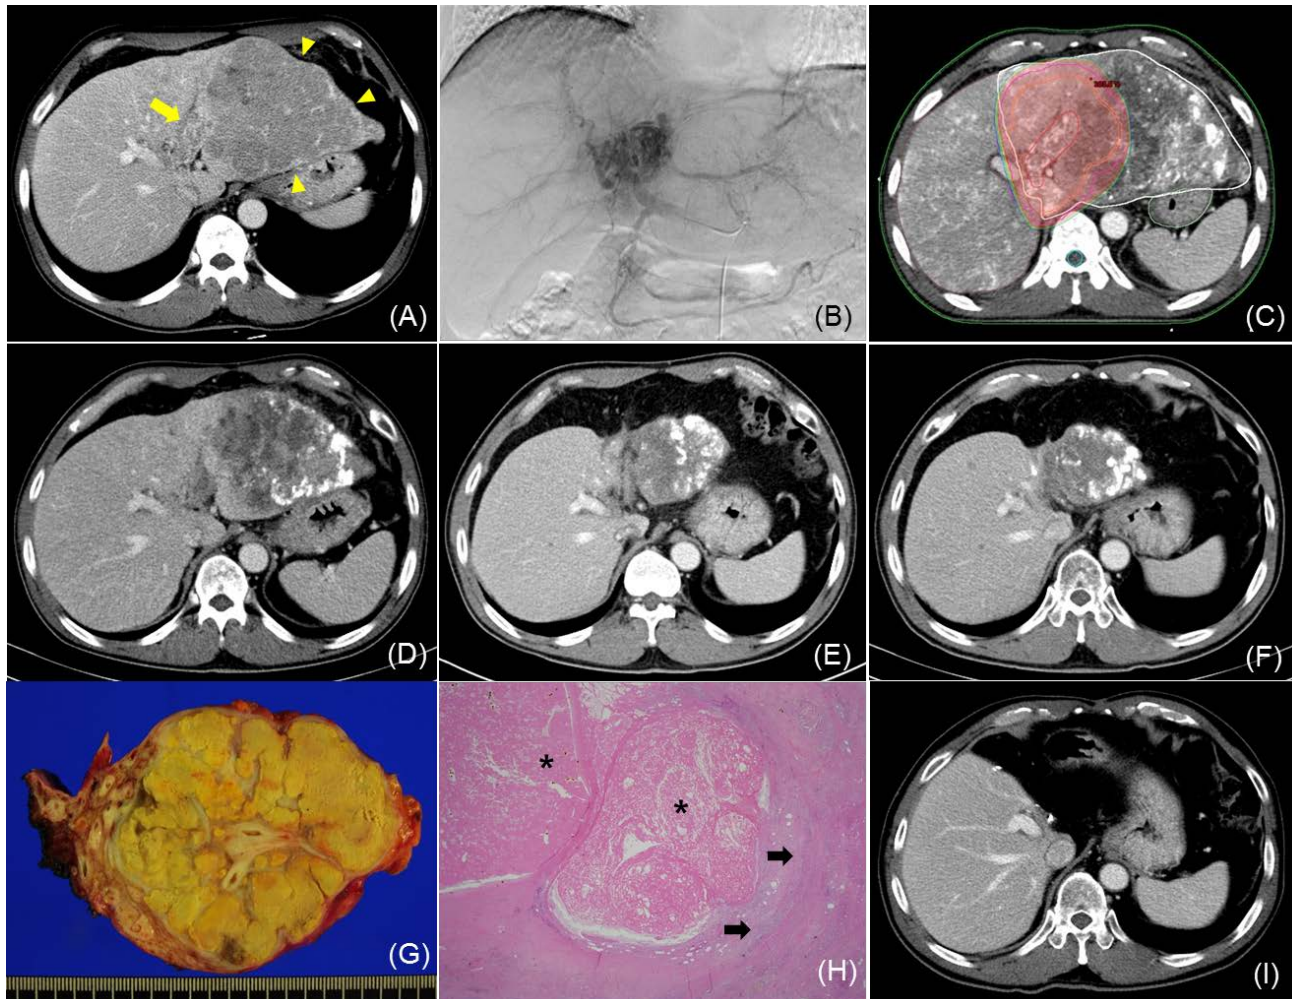

(A) Computed tomography (CT) scan at diagnosis, showing a 14-cm HCC in the left lobe (yellow triangles) and PVTT in the left portal vein (yellow arrow). (B) Celiac arteriogram for TACE, showing a diffuse tumor staining in the left of the liver. (C) Twelve days after TACE, RT for PVTT and a 2-cm margin into the contiguous HCC was performed with a total dose of 40 Gy in 16 fractions. (D) CT scan at week 12. (E) Follow-up CT scan at week 24. (F) At 36 weeks after randomization, the patient showed partial tumor response after receiving a total of 6 TACE procedures. (G) At week 40, left hepatectomy was performed. On the examination of the gross specimen, a 7.5 x 5.5 x 5.0 cm sized tumor was observed. (H) On microscopic examination, residual tumor cells (Edmondson-Steiner grade III/III) were found focally (black arrow); however, the majority (99%) of the tumor consisted of necrotic tissue (black asterisk) (original magnification, x 12.5). (I) By the last follow-up at 140 weeks, no recurrence was observed on liver-dynamic CT scan.
